# Supplementary material for: Cell surface proteomics of patient-derived malignant rhabdoid tumor organoids identifies ROBO1 as promising CAR T cell target for pediatric solid tumors
Source: Research Square preprint supplement (doi:10.21203/rs.3.rs-6111378/v1), 2025-03-24
Supplement: Supplementary file [file 589c0d3b6b3ef45712d479fd.pdf]

A

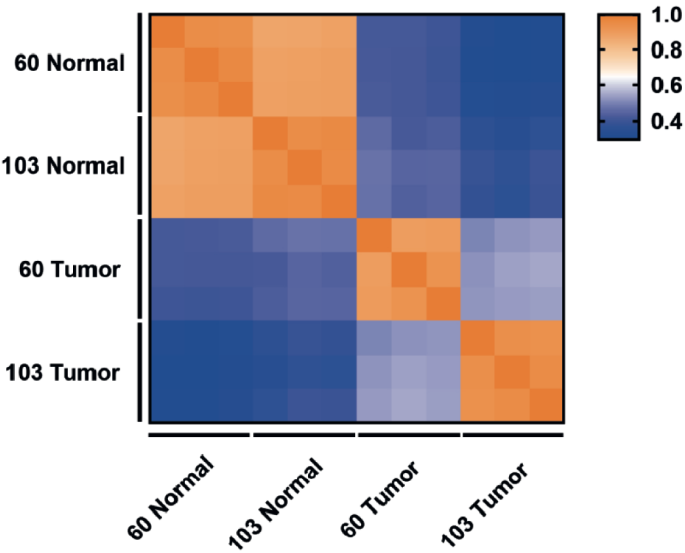

B

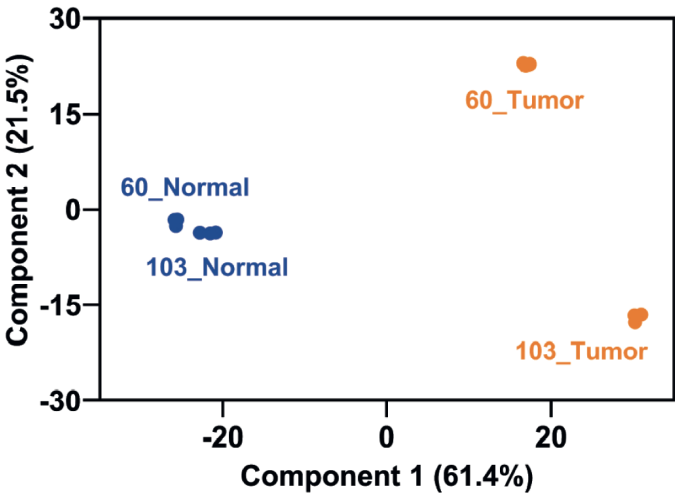

C

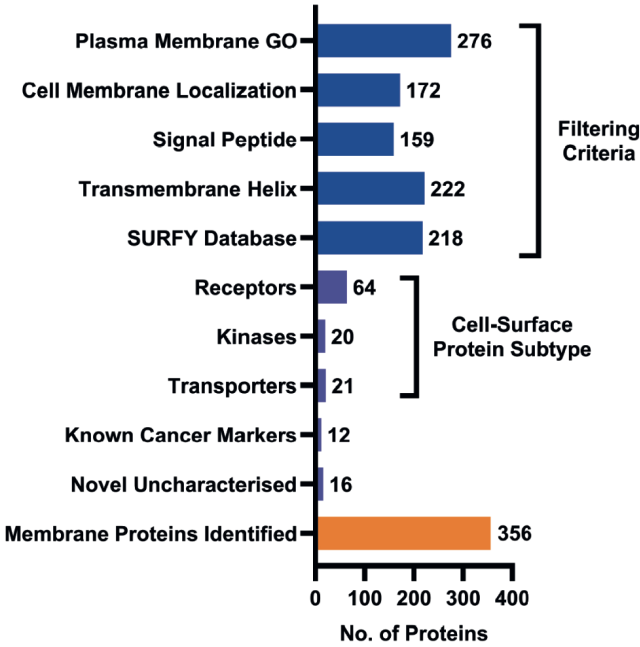

D

| Target    | Fold Overexpression |            |
|-----------|---------------------|------------|
|           | 103T vs 103H        | 60T vs 60H |
| ROBO1     | 118.6               | 2.7        |
| CSPG4     | 100.7               | 3.4        |
| MICB      | 9.2                 | 2.6        |
| TNFRSF10B | 5.8                 | 11.1       |

**Supplementary Figure 1. Cell surface proteomics of patient-derived MRT organoids identifies potential targets for CAR T cell therapy.**

(A) Pearson correlation plot and (B) principal component analysis plot comparing the proteomes of two patient-matched normal kidney and eMRT organoids.

(C) Distribution of identified membrane proteins based on filtering criteria, cell surface protein subtype, known cancer-associated markers and novel uncharacterized proteins.

(D) Table showing fold overexpression of ROBO1, CSPG4, MICB and TNFRSF10B in 103T vs. 103H organoids and 60T vs. 60H organoids.

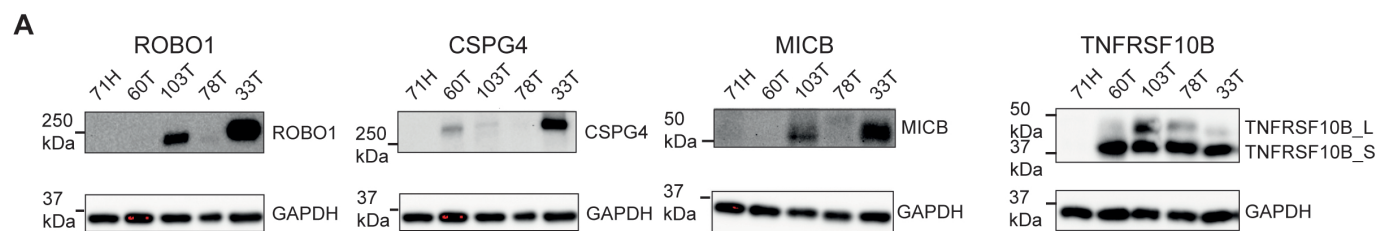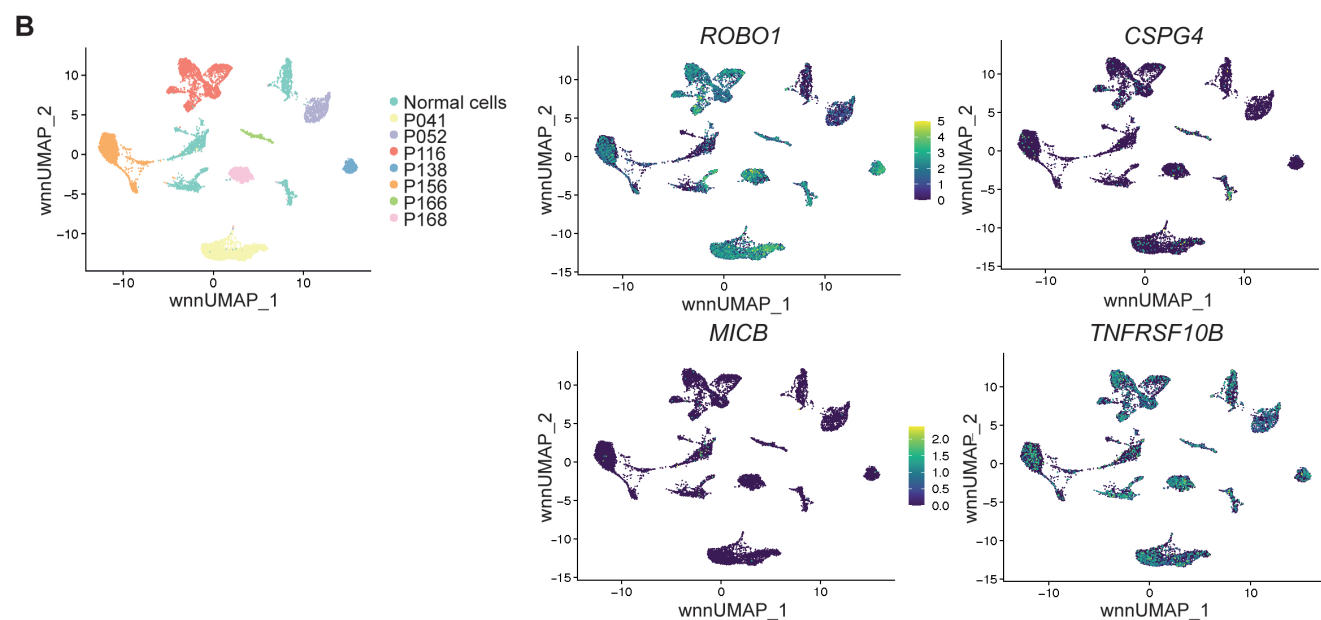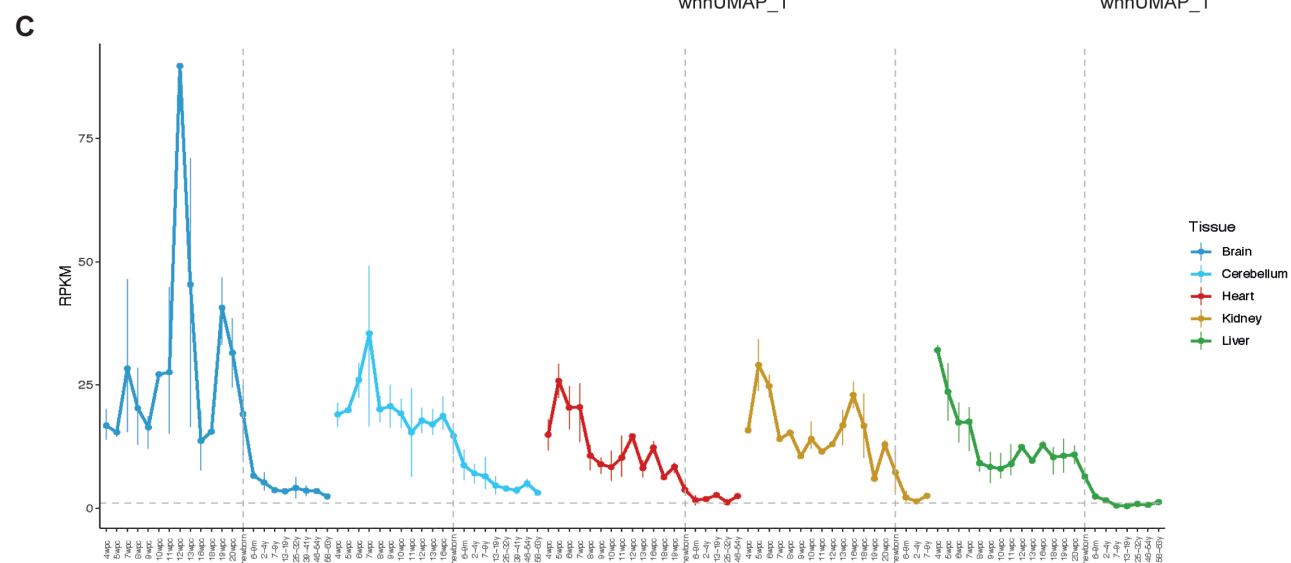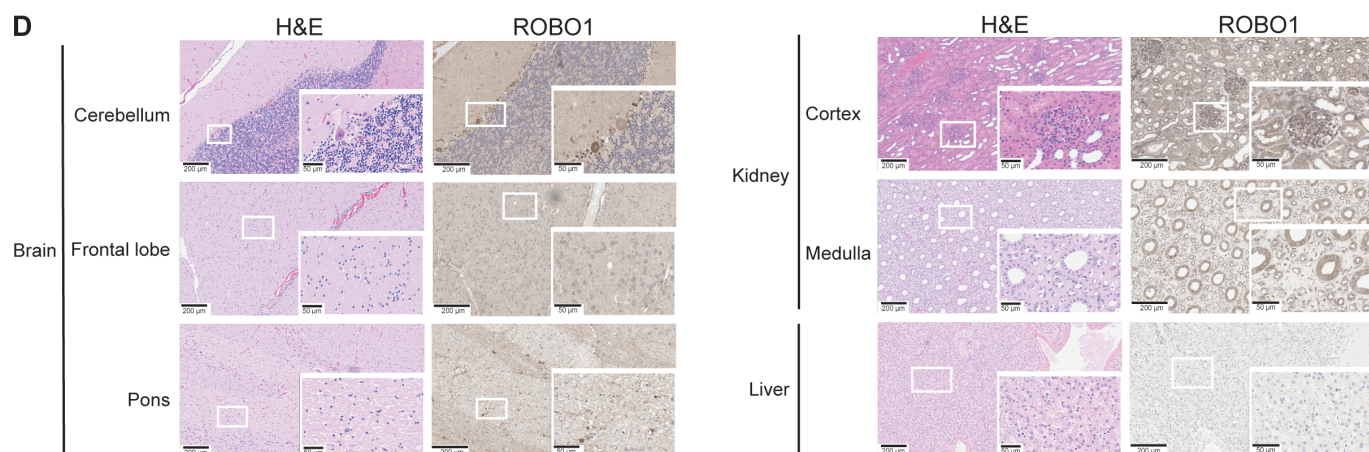

**Supplementary Figure 2. Gene and protein expression analysis validates ROBO1, CSPG4, MICB and TNFRSF10B upregulation in MRT organoids and tissues.**

(A) Western blot analysis of ROBO1, CSPG4, MICB, and TNFRSF10B in one normal kidney organoid model (H) and four eMRT organoids (T).

(B) UMAP visualization of main cell types in eMRT tissues, along with the expression patterns of *ROBO1*, *CSPG4*, *MICB* and *TNFRSF10B* genes.

(C) Temporal expression of *ROBO1* across normal tissues (brain, cerebellum, heart, kidney, and liver) during development. The dotted vertical line indicates the newborn stage.

(D) Representative IHC images of ROBO1 expression in normal brain (cerebellum, frontal lobe, and pons), kidney (cortex and medulla) and liver tissues.



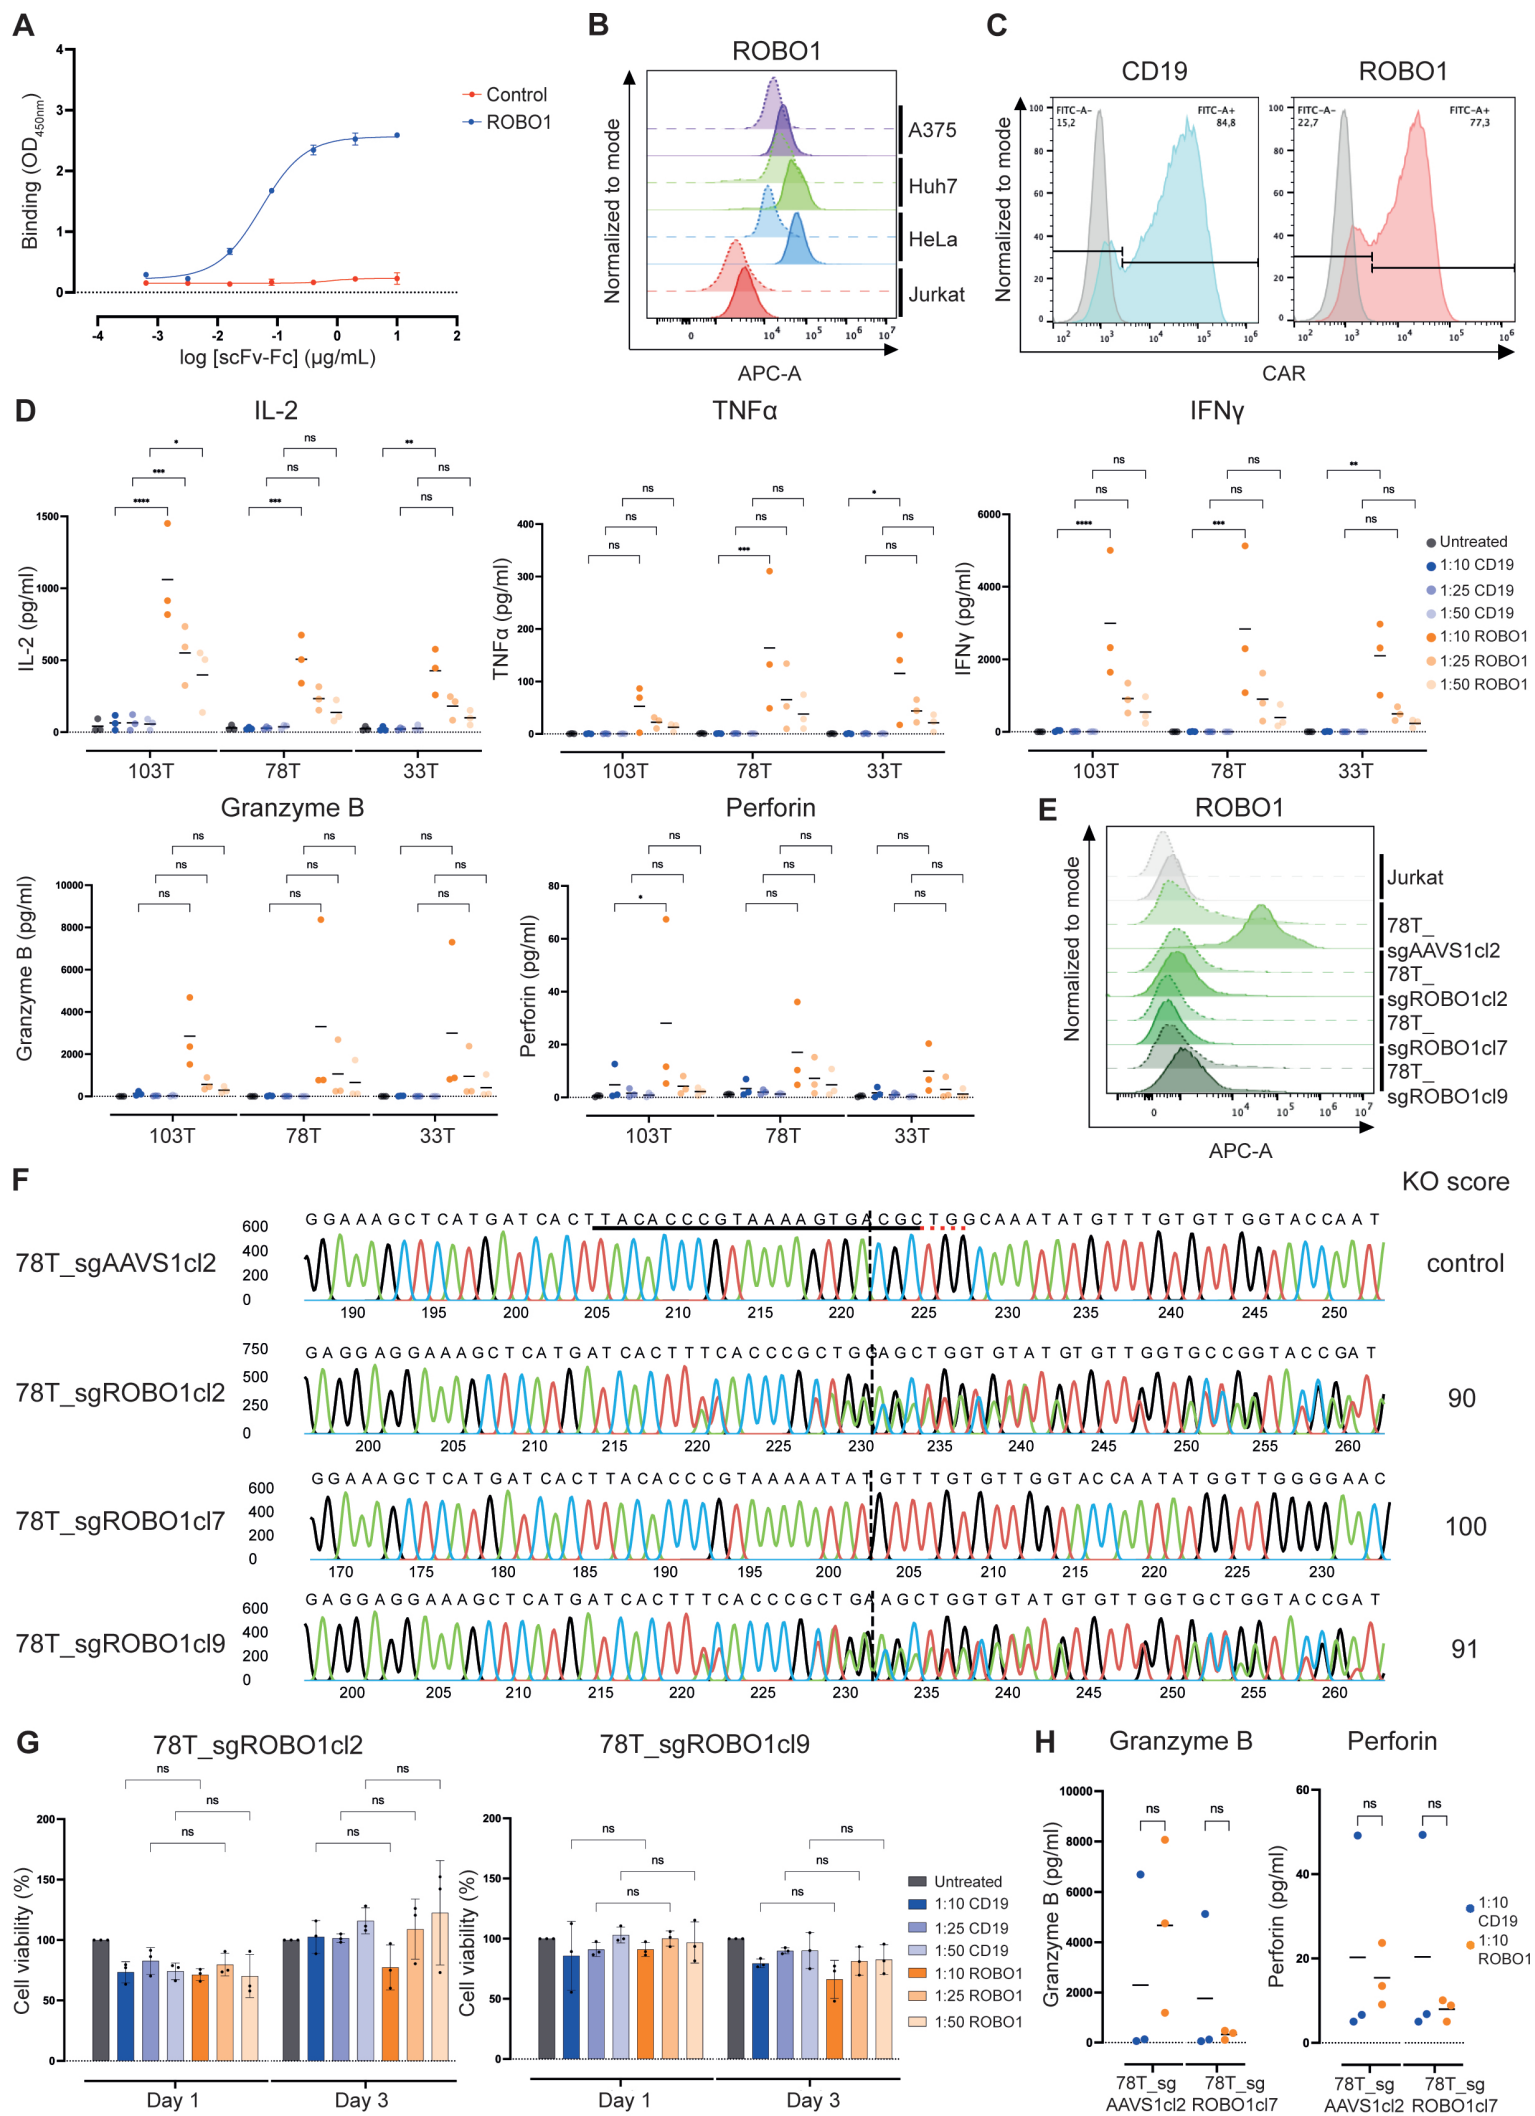

**Supplementary Figure 3. ROBO1-targeting CAR T cells elicit strong and specific anti-tumor activity in eMRT organoids.**

(A) ELISA and (B) flow cytometry confirming the binding of the recombinant anti-ROBO1 scFv-Fc to recombinant ROBO1 and cell surface-expressed ROBO1, respectively. Representative figures of three biological replicates. ELISA error bars represent SD of two technical replicates. Dashed lines in flow cytometry histograms indicate secondary antibody controls.

(C) Flow cytometry analysis of CAR expression on ROBO1 and CD19 CAR T cells.

(D) Cytokine production after 1-day co-culture of CD19 or ROBO1 CAR T cells with eMRT organoids at varying E:T ratios. Mean of three biological replicates, each containing the mean of two technical replicates.

(E) Flow cytometry histogram of ROBO1 expression on Jurkat cells, control (78T\_sgAAVS1cl2) and three ROBO1 (78T\_sgROBO1cl2, cl7 and cl9) knock-out eMRT organoid models. Solid lines: ROBO1 antibody staining; dashed lines: secondary controls. Representative data of three biological replicates.

(F) Sanger sequencing validation of ROBO1 knock-out (78T\_sgROBO1cl2, cl7 and cl9) vs. AAVS1 control knock-out (78T\_sgAAVS1cl2), highlighting sgRNA target and PAM sequence.

(G) Cell viability of ROBO1 knock-out eMRT organoids (78T\_sgROBO1cl2 and cl9) after 1 or 3 days of co-culture with ROBO1 or CD19 CAR T cells. Results were normalized to untreated organoids. Mean  $\pm$  SD of three biological replicates, each consisting of the mean of at least three technical replicates.

(H) Cytokine production after 1-day co-culture of CD19 or ROBO1 CAR T cells with control (78T\_sgAAVS1cl2) or ROBO1 knock-out eMRT organoids (78T\_sgROBO1cl7) at an E:T of 1:10. Mean of three biological replicates, each consisting of the mean of two technical replicates.

Statistical significance as in Fig. 2A.

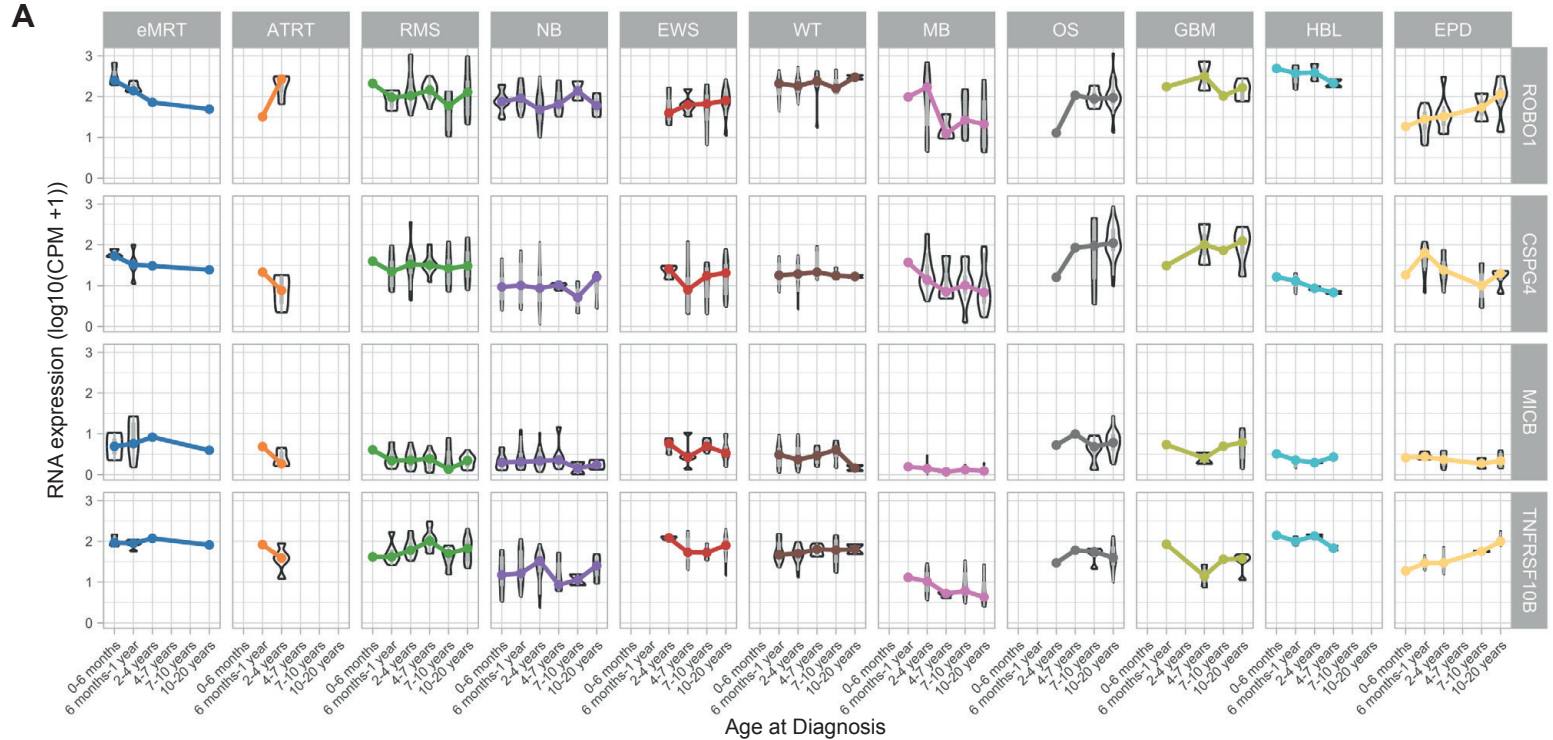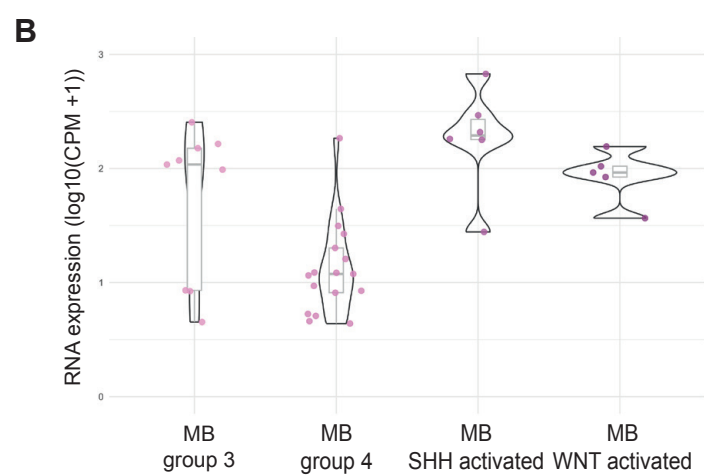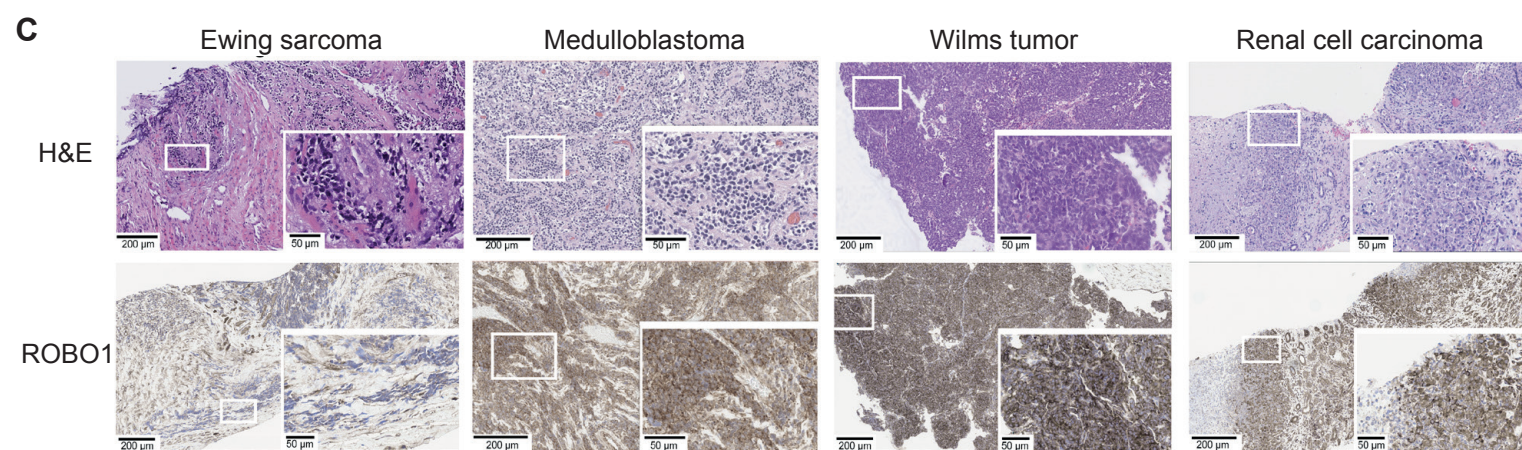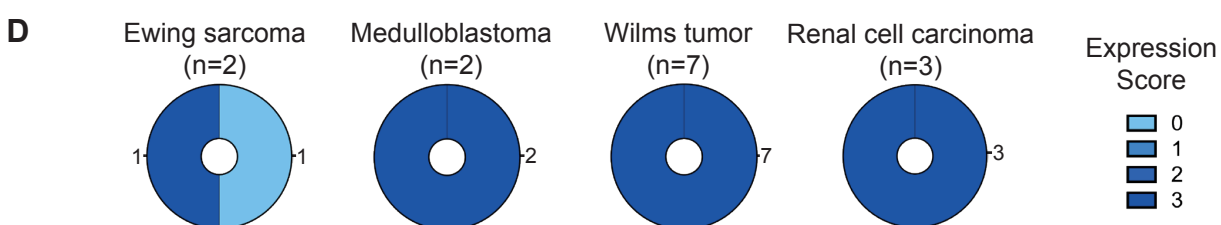

**Supplementary Figure 4. ROBO1 is a promising CAR T cell target for other pediatric solid tumors.**

(A) Violin plot showing RNA expression of *ROBO1*, *CSPG4*, *MICB*, and *TNFRSF10B* in pediatric solid tumors, stratified by age at diagnosis.

(B) Violin plot of *ROBO1* RNA expression in medulloblastoma, categorized by subtype.

(C) Representative IHC images of ROBO1 expression in Ewing sarcoma, medulloblastoma, Wilms tumor and renal cell carcinoma tissues, and expression scores (D).

**A**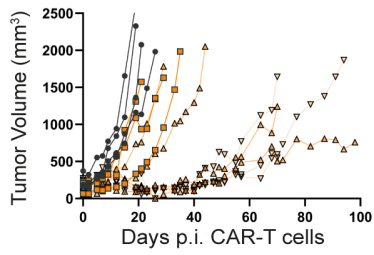**B**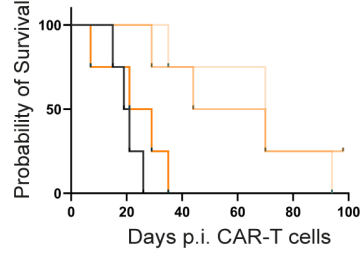**C**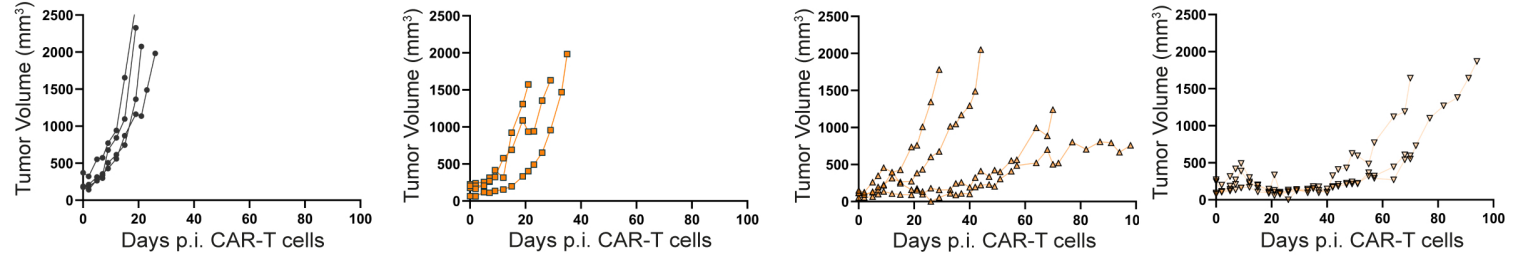**D**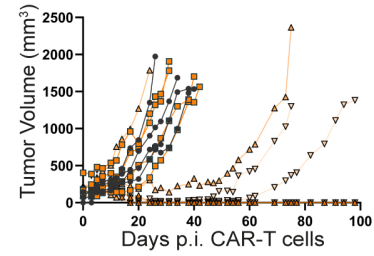**E**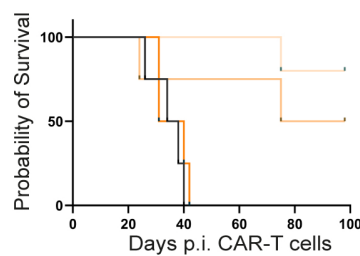**F**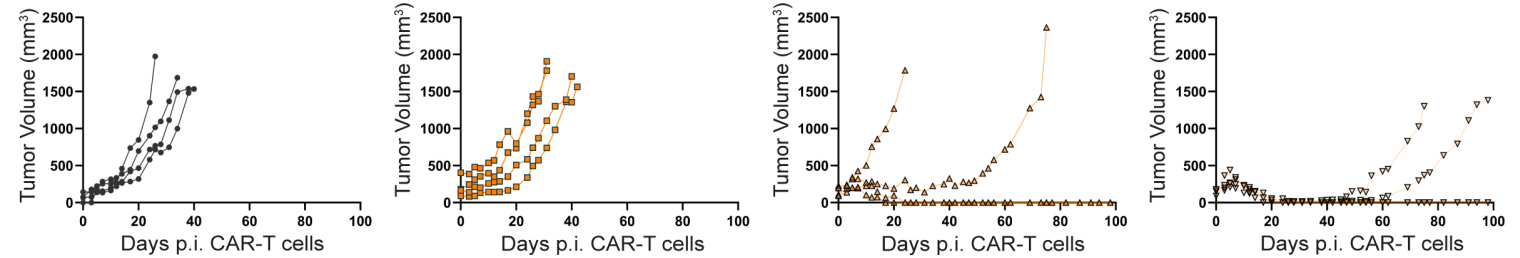

**Supplementary Figure 5. ROBO1 CAR T cells exhibit dose-dependent functionality in eMRT PDX mouse models.**

(A) Tumor growth of 33T organoids following injections of PBS or increasing doses ROBO1 CAR T cells ( $1 \times 10^6$ ,  $3 \times 10^6$ , and  $6 \times 10^6$ ), presented as the mean tumor volume  $\pm$  SEM (n=4/group).

(B) Kaplan-Meier survival curves of mice in (A) treated with PBS or ROBO1 CAR T cells.

(C) Individual growth trajectories of tumors in mice in (A) treated with PBS or CD19 CAR T cells.

(D) Tumor growth of 103T organoids following injections of PBS or increasing doses ROBO1 CAR T cells ( $1 \times 10^6$ ,  $3 \times 10^6$ , and  $6 \times 10^6$ ), presented as mean tumor volume  $\pm$  SEM (n=4/group).

(E) Kaplan-Meier survival curves of mice in (D) treated with PBS or ROBO1 CAR T cells.

(F) Individual growth trajectories of tumors in mice in (D) treated with PBS or ROBO1 CAR T cells.

Statistical significance as in Fig. 2A.



**A**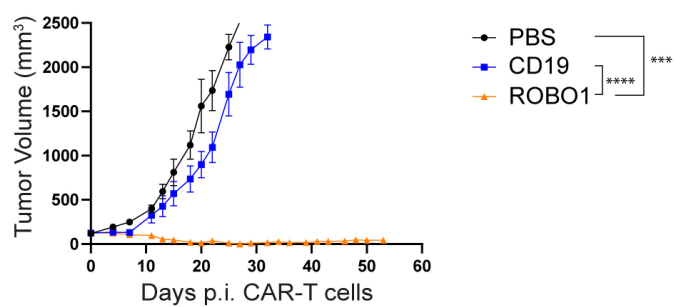**B**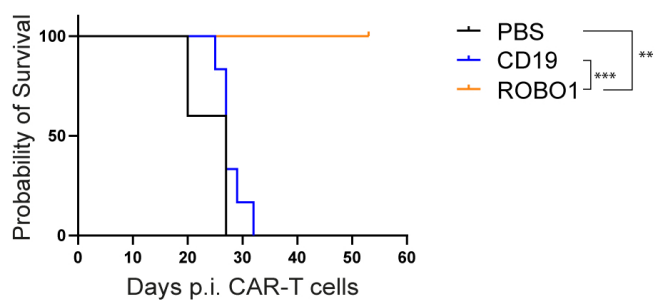**C**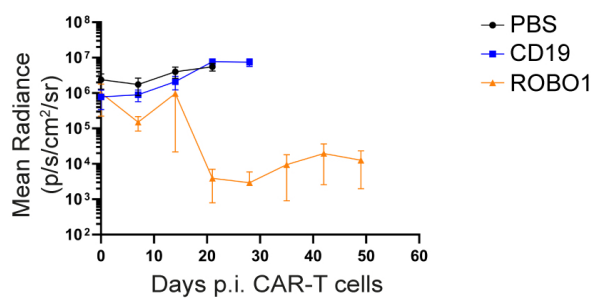**D**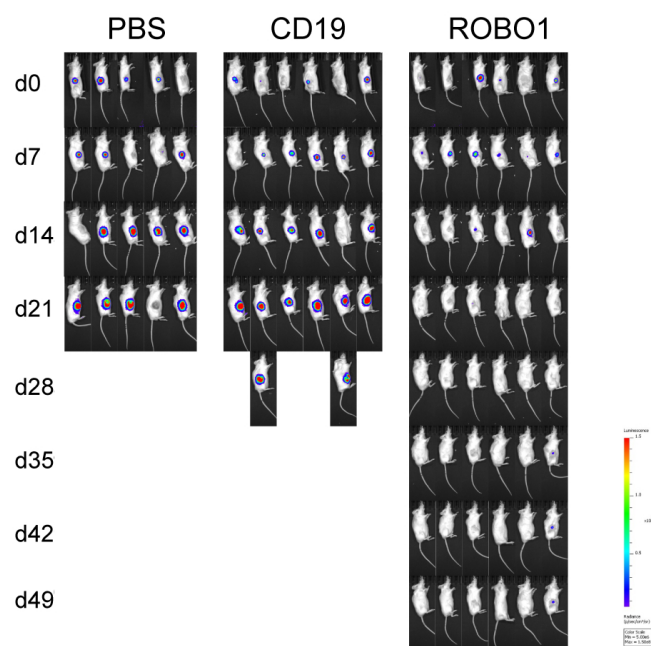**E**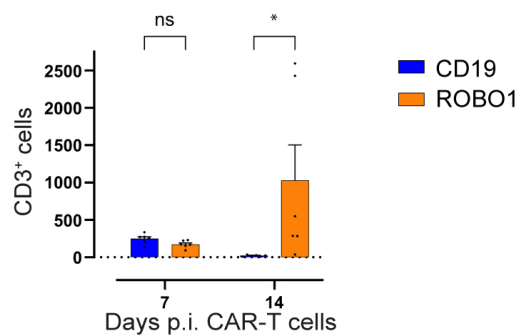**F**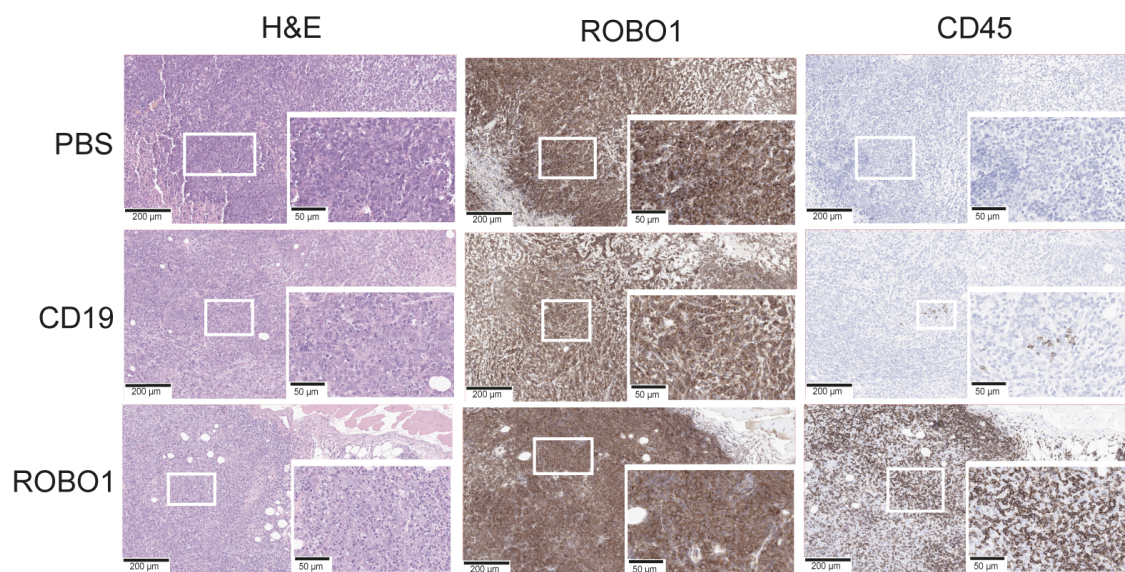

**Supplementary Figure 6. ROBO1-targeting CAR T cells induce potent and sustained cytotoxicity, eradicating eMRTs in vivo.**

(A) Growth of 33T-engrafted organoids in mice following CAR T cell injections, presented as mean tumor volume  $\pm$  SEM (n=5 for PBS, n=6 for CD19 and ROBO1 CAR T cells).

(B) Kaplan-Meier survival curves of mice in (A).

(C) Longitudinal tumor burden from mice in (A) monitored by BLI.

(D) Representative BLI images of mice in (A).

(E) Flow cytometry analysis of peripheral blood from mice in (A), showing post-treatment immune cell counts.

(F) Representative IHC images tumor tissues from mice, assessing human ROBO1 and human CD45 expressing in treated mice.

Statistical significance as in Fig. 2A.
